# Supplementary material for: Endogenous and combination retinoids are active in myelomonocytic leukemias
Source: PubMed Central journal article supplement — Haematologica. 2021 Feb 4;106(4):1008–21. doi: 10.3324/haematol.2020.264432 (PMC8017822; doi:10.3324/haematol.2020.264432), 2021-02-04
Supplement: 2020_264432-Disclosures_Contributions.pdf [file 2020_264432-Disclosures_Contributions.pdf]

Haematologica  
HAEMATOL/2020/264432  
Version 3

Endogenous and combination retinoids are active in myelomonocytic  
leukemias

Orsola di Martino, Haixia Niu, Gayla Hadwiger, Heikki Kuusanmaki,  
Margaret A. Ferris, Anh Vu, Jeremy Beales, Carl Wagner, María P.  
Menéndez-Gutiérrez, Mercedes Ricote, Caroline Heckman, and John  
S. Welch

Disclosures: none

Contributions: J.S.W. and O.d.M designed experiments, performed experiments, and wrote the manuscript. H.N., G.H., H.K., M.A.F., A.V., J.B., C.W., M.P.M, M.R., C.H. designed and performed experiments
